# Supplementary material for: Divergent responses of photosynthesis and wood growth to climatic drivers
Source: Research Square preprint supplement (doi:10.21203/rs.3.rs-2300158/v1), 2023-01-11
Supplement: Supplementary file 1 [file 1b53560d1043cb44e6ff3f2e.docx]

Supplementary Material

**Table S1. Information of the FLUXNET and inventory sites used in this study**

| Site | GPP Type | Growth Type | Lat. | Lon. | Region | Species | Forest type | MAT | MAP | Reference |
| --- | --- | --- | --- | --- | --- | --- | --- | --- | --- | --- |
| FI-Hyy | Flux | TRWi | 61.8475 | 24.295 | Europe | PISY | ENF | 3.8 | 709.0 | Babst et al. 1 |
| DK-Sor | Flux | TRWi | 55.4859 | 11.6446 | Europe | FASY | DBF | 8.2 | 660 | Ditto |
| IT-Sro | Flux | TRWi | 43.7279 | 10.2844 | Europe | PIPI | ENF | 14.2 | 920 | Ditto |
| DE-Tha | Flux | TRWi | 50.9636 | 13.5669 | Europe | PCAB | ENF | 7.7 | 820 | Ditto |
| BE-Bra | Flux | TRWi | 51.3092 | 4.5206 | Europe | PISY | MF | 9.8 | 750 | Ditto |
| CA-Man | Flux | TRWi | 55.8796 | -98.4808 | Canada | PIMA | ENF | -3.2 | 520 | Rocha et al. 2 |
| CA-BM1 | Flux | DBH | 53.629 | -106.2 | Canada | PPTR | ENF | 0.4 | 467 | Theede et al. 3 |
| CA-BM2 | Flux | DBH | 53.985 | -105.12 | Canada | PIBA | ENF | 0.4 | 467 | Ditto |
| CH-Dav | Flux | Dendrometer | 46.8153 | 9.8559 | Europe | PIAB | ENF | 2.8 | 1062 | Mund et al. 4 |
| FR-Pue | Flux | Dendrometer | 43.7414 | 3.5958 | Europe | QUIL | EBF | 13.5 | 883 | Zweifel et al. 5 |
| CR-za | Flux | Dendrometer | 45.62 | 15.687 | Europe | QURO | DBF | 10.6 | 962 | Lempereur et al. 6 |
| SW-No | Flux | TRWi | 60.083 | 17.483 | Europe | PIAB | ENF | 5 | 527 | Anić et al. 7 |
| DE-Hai | Flux | Dendrometer | 51.0792 | 10.453 | Europe | FASY | DBF | 8.3 | 720 | Lagergren et al. 8 |
| JP-NT | Flux | DBH | 36.133 | 137.417 | Asia | MIX | DBF | 7.2 | 2275 | Ditto |
| FR-Hes | Flux | DBH | 48.008 | 7.065 | Europe | FASY | DBF | 8.9 | 390 | Mund et al. 9 |
| FR-Fon | Flux | TRW and wood density | 48.467 | 2.767 | Europe | QUPE (sessile oak) | DBF | 11.2 | 677 | Delpierre et al. 10 |
| US-Ha1 | Flux | TRWi | 42.5378 | -72.1715 | US | QURU/ACRU | DBF | 6.62 | 1071 | Belmecheri et al. 11 |
| US-Me2 | Flux | TRWi | 44.4523 | -121.557 | US | PSME/TSME | ENF | 6.28 | 523 | Zhao et al.12 |
| US-MMS | Flux | TRWi | 39.3232 | -86.4131 | US | QUVE | DBF | 10.85 | 1032 | Ditto |
| US-NR1 | Flux | TRWi | 40.0329 | -105.546 | US | PIPO | ENF | 1.5 | 800 | Ditto |
| LaS | RS | DBH | 10.43 | -84.01 | South America | / | / | 23.31499 | 3712.713 | Yu et al. 13 |
| BAC | RS | DBH | 7.5 | -71 | South America | / | / | 27.49161 | 1625.91 | Ditto |
| BNT | RS | DBH | -2.6 | -60.2 | South America | / | / | 27.76897 | 2258.518 | Ditto |
| CLA | RS | DBH | 10 | -65.2 | South America | / | / | 26.89045 | 918.7069 | Ditto |
| ELD | RS | DBH | 6.1 | -61.4 | South America | / | / | 25.02525 | 1965.863 | Ditto |
| RET | RS | DBH | -11 | -65.7 | South America | / | / | 26.90433 | 1669.804 | Ditto |

**Table S2.** **Summary of gridded data used in this study.**

| Data name | Brief description | Spatial resolution | Temporal resolution | Time period | Reference |
| --- | --- | --- | --- | --- | --- |
| Data used to train the random forest model | | | | | |
| CRU-NCEP v7 | Climate forcings including air temperature, maximum temperature, minimum temperature,  total precipitation, specific humidity,  downward solar radiation flux,  downward long wave radiation flux,  pressure,  zonal component of wind speed, meridional component of wind speed | 0.5° | 6hr | 1982-2010 | Viovy et al. 14 |
| GSDE | Soil information including total carbon, organic carbon, total N, total S, CaCO3, gypsum, pH(H2O), pH(KCl), pH(CaCl2), Electrical conductivity, Exchangeable calcium, Exchangeable magnesium,  Exchangeable sodium, Exchangeable potassium, Exchangeable aluminum, Exchangeable acidity, Cation exchange capacity, Base saturation, Sand content, Silt content, Clay content, Gravel content, Bulk density, Volumetric water content at -10 kPa, Volumetric water content at -33 kPa, Volumetric water content at -1500 kPa, The amount of phosphorous using the Bray1 method, The amount of phosphorous by Olsen method, Phosphorous retention by New Zealand method, The amount of water soluble phosphorous, The amount of phosphorous by Mehlich method, exchangeable sodium percentage, Total phosphorus, Total potassium | 0.0833° | One map | / | Wei et al. 15 |
| LAI-3g | Vegetational information | 0.0727° | Monthly | 1982-2010 | Zhu et al. 16 |
| GPP datasets | | | | | |
| TRENDY v7 | 16 DGVMs | 1° | Monthly | 1982-2010 | Sitch et al. 17 |
| FLUXCOM  (Climate-driven) | Global GPP datasets based on machine learning approaches using climate forcings as predictor | 0.5° | Annual | 1982-2010 | Jung et al. 18 |
| EC-LUE | Remote sensing based GPP product | 0.05° | Half month | 1982-2010 | Yuan et al. 19 |
| BEPS | Remote sensing based GPP  product | 0.0833° | Half month | 1982-2010 | Chen et al. 20 |
| GPPinf | Remote sensing based GPP  product | 0.05° | Half month | 1982-2010 | Wang et al. 21 |
| Other datasets | | | | | |
| GEOCARBON | An aboveground biomass product using an independent reference dataset of field observations and locally calibrated high-resolution biomass maps. | 0.01° | One map | 2000-2010 | Avitabile et al.22 |
| MODIS NPP | Remote sensing based NPP  product | 0.0085° | Annual | 2000-2010 | Zhao et al. 23 |
| NACP forest age map | Forest age map products at 1-km resolution for Canada and the United States (U.S.A.) | 0.01° | One map | 2004 for Canada and 2006 for the United States | Pan et al.24 |
| GFAD v1.1 | The global forest age dataset | 0.5° | One map | 2000-2010 | Poulter et al.25 |

**References:**

1. Babst, F. *et al.* Above‐ground woody carbon sequestration measured from tree rings is coherent with net ecosystem productivity at five eddy‐covariance sites. *New Phytol.* **201**, 1289–1303 (2014).

2. Rocha, A. V., Goulden, M. L., Dunn, A. L. & Wofsy, S. C. On linking interannual tree ring variability with observations of whole‐forest CO2 flux. *Glob. Change Biol.* **12**, 1378–1389 (2006).

3. Theede, A. D. Biometric and eddy-covariance estimates of ecosystem carbon storage at two boreal forest stands in Saskatchewan: 1994-2004. (2007).

4. Mund, M. *et al.* The influence of climate and fructification on the inter-annual variability of stem growth and net primary productivity in an old-growth, mixed beech forest. *Tree Physiol.* **30**, 689–704 (2010).

5. Zweifel, R. *et al.* Link between continuous stem radius changes and net ecosystem productivity of a subalpine Norway spruce forest in the Swiss Alps. *New Phytol.* **187**, 819–830 (2010).

6. Lempereur, M. *et al.* Growth duration is a better predictor of stem increment than carbon supply in a M editerranean oak forest: implications for assessing forest productivity under climate change. *New Phytol.* **207**, 579–590 (2015).

7. Anić, M. *et al.* Eddy covariance vs. biometric based estimates of net primary productivity of pedunculate oak (Quercus robur L.) forest in Croatia during ten years. *Forests* **9**, 764 (2018).

8. Lagergren, F., Jönsson, A. M., Linderson, H. & Lindroth, A. Time shift between net and gross CO 2 uptake and growth derived from tree rings in pine and spruce. *Trees* **33**, 765–776 (2019).

9. Mund, M. *et al.* It is not just a ‘trade‐off’: indications for sink‐and source‐limitation to vegetative and regenerative growth in an old‐growth beech forest. *New Phytol.* **226**, 111–125 (2020).

10. Delpierre, N., Berveiller, D., Granda, E. & Dufrêne, E. Wood phenology, not carbon input, controls the interannual variability of wood growth in a temperate oak forest. *New Phytol.* **210**, 459–470 (2016).

11. Belmecheri, S. *et al.* Tree-ring δ 13C tracks flux tower ecosystem productivity estimates in a NE temperate forest. *Environ. Res. Lett.* **9**, 074011 (2014).

12. Zhao, S. *et al.* The International Tree‐Ring Data Bank (ITRDB) revisited: Data availability and global ecological representativity. *J. Biogeogr.* **46**, 355–368 (2019).

13. Yu, K. *et al.* Pervasive decreases in living vegetation carbon turnover time across forest climate zones. *Proc. Natl. Acad. Sci.* **116**, 24662–24667 (2019).

14. Viovy, N. CRU-NCEP dataset, v7. *URL Httpsvesg Ipsl Upmc Frthreddscatalogstorep529viovcruncepV719012015catalog Html Accessed 27 June 2017* (2016).

15. Shangguan, W., Dai, Y., Duan, Q., Liu, B. & Yuan, H. A global soil data set for earth system modeling. *J. Adv. Model. Earth Syst.* **6**, 249–263 (2014).

16. Zhu, Z. *et al.* Global data sets of vegetation leaf area index (LAI) 3g and fraction of photosynthetically active radiation (FPAR) 3g derived from global inventory modeling and mapping studies (GIMMS) normalized difference vegetation index (NDVI3g) for the period 1981 to 2011. *Remote Sens.* **5**, 927–948 (2013).

17. Sitch, S. *et al.* Recent trends and drivers of regional sources and sinks of carbon dioxide. *Biogeosciences* **12**, 653–679 (2015).

18. Jung, M. *et al.* The FLUXCOM ensemble of global land-atmosphere energy fluxes. *Sci. Data* **6**, 1–14 (2019).

19. Yuan, W. *et al.* Increased atmospheric vapor pressure deficit reduces global vegetation growth. *Sci. Adv.* **5**, eaax1396 (2019).

20. Chen, J. M. *et al.* Vegetation structural change since 1981 significantly enhanced the terrestrial carbon sink. *Nat. Commun.* **10**, 1–7 (2019).

21. Wang, S., Zhang, Y., Ju, W., Qiu, B. & Zhang, Z. Tracking the seasonal and inter-annual variations of global gross primary production during last four decades using satellite near-infrared reflectance data. *Sci. Total Environ.* **755**, 142569 (2021).

22. Avitabile, V. *et al.* An integrated pan‐tropical biomass map using multiple reference datasets. *Glob. Change Biol.* **22**, 1406–1420 (2016).

23. Zhao, M., Heinsch, F. A., Nemani, R. R. & Running, S. W. Improvements of the MODIS terrestrial gross and net primary production global data set. *Remote Sens. Environ.* **95**, 164–176 (2005).

24. Pan, Y. *et al.* NACP Forest Age Maps at 1-km Resolution for Canada (2004) and the USA (2006). *ORNL DAAC* (2012).

25. Poulter, B. *et al.* The global forest age dataset and its uncertainties (GFADv1. 1). *NASA Natl. Aeronaut. Space Adm. PANGAEA* (2019).
